# Supplementary material
Source: PubMed Central journal article supplement (PMC3234756)
Supplement: supp_M111.270132_jbc.M111.270132-1.pdf [file supp_M111.270132_jbc.M111.270132-1.pdf]

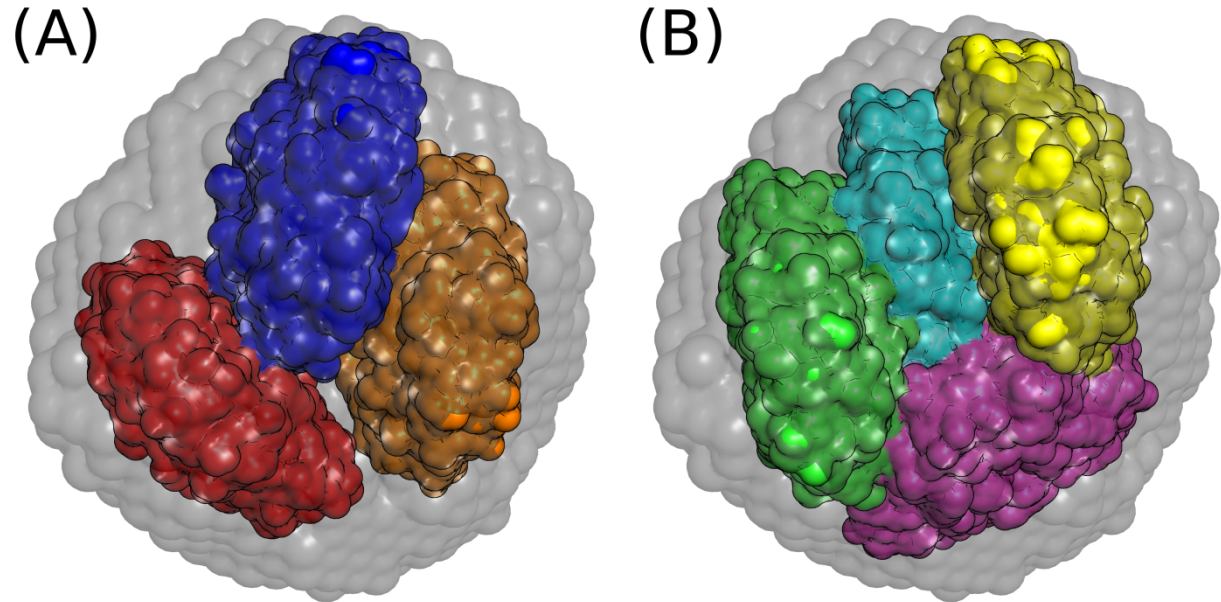

Supplemental Figure 1S. A superposition of the average bead model envelope for rsAra h 1 with the rigid body models for three (A) and four (B) trimeric assemblies, respectively. The average bead model envelope was constructed with DAMAVER. The rigid body models depict possible arrangements of the oligomeric states computed with SASREF. The alignment was conducted using SUPCOMB.
